# Supplementary material
Source: Research Square preprint supplement (doi:10.21203/rs.3.rs-9780692/v1)
Supplement: Supplementary file 2 [file 10e5c84584db671bb36b6441.pdf]

# Land Use and Propolis Composition: An Analysis of the Wax Content of *Apis mellifera* Propolis

Roberts, J.\*, Donkersley, D., Quayle, S., and Rennie, A.

\*Corresponding author: j.m.roberts@lancaster.ac.uk

## Propolis harvesting information questionnaire

Thank you for participating in this propolis collection research project! By completing this form and returning the propolis sample you are confirming that:

- You have read the participant information sheet and understand what is expected of you within this study
- You understand that any responses/information you give will remain anonymous
- Your participation is voluntary
- You consent that the data will be pooled and published and that if quotes are provided they could be published
- You consent to Lancaster University keeping the anonymised data for a period of 10 years after the study has finished

Location of hive (please provide a 2 letter, 6 figure grid reference): .....

Have you sampled multiple hives at this location for this citizen science project? **Yes/No**

**If Yes:**

Please note how many hives have been sampled (please circle):                    2                    3

This is hive (please circle):            1            2            3            of            2            3

Date of installation of propolis screen: .....

Date of removal of propolis screen\*: .....

Anticipated date of postage to Lancaster University\*: .....

Colony species: .....

Did you return a propolis sample from this hive for round 1 of the citizen science project? **Yes/No**

**Please note any other comments in the space below:**

\*To allow us to record any variations between time of collection and postage between samples.
